# Supplementary material for: Psychological Support Interventions for Healthcare Providers and Informal Caregivers during the COVID-19 Pandemic: A Systematic Review of the Literature
Source: MDPI journal article supplement (doi:10.3390/ijerph18136939), 2021-06-28
Supplement: s1 [file s1]

---

S1: Quality Assessment Tool for Quantitative Studies Dictionary

[illegible]

## A - SELECTION BIAS

|    |                                                                                                                |                     |                     |                     |                     |                     |
|----|----------------------------------------------------------------------------------------------------------------|---------------------|---------------------|---------------------|---------------------|---------------------|
| Q1 | Are the individuals selected to participate in the study likely to be representative of the target population? | 2 - Somewhat likely |
| Q2 | What percentage of selected individuals agreed to participate?                                                 | 5 - Can't tell      | 1 - 80-100%         | 1 - 80-100%         | 1 - 80-100%         | 1 - 80-100%         |
|    | Rate of the section                                                                                            | 2                   | 2                   | 2                   | 2                   | 2                   |

## B - STUDY DESIGN

|    |                                                                     |                                |                                |                                |                                          |                                          |
|----|---------------------------------------------------------------------|--------------------------------|--------------------------------|--------------------------------|------------------------------------------|------------------------------------------|
| Q1 | Indicate the study design                                           | 5 - Cohort (1 group, pre+post) | 5 - Cohort (1 group, pre+post) | 5 - Cohort (1 group, pre+post) | 3 - Cohort analytic (2 groups, pre+post) | 3 - Cohort analytic (2 groups, pre+post) |
| Q2 | Was the study described as randomized?<br>If NO, go to Component C. | No                             | No                             | No                             | No                                       | No                                       |
| Q3 | If Yes, was the method of randomization described? (See dictionary) | NR                             | NR                             | NR                             | NR                                       | NR                                       |
| Q4 | If Yes, was the method appropriate? (See dictionary)                | NR                             | NR                             | NR                             | NR                                       | NR                                       |
|    | Rate of the section                                                 | 2                              | 2                              | 2                              | 2                                        | 2                                        |

## C - CONFOUNDERS

|                                    |                                                                                                                                                  |                |                |                |                    |                |
|------------------------------------|--------------------------------------------------------------------------------------------------------------------------------------------------|----------------|----------------|----------------|--------------------|----------------|
| Q1                                 | Were there important differences between groups prior to the intervention?                                                                       | 2 - No         | 2 - No         | 2 - No         | 1 - Yes            | 2 - No         |
| Q2                                 | If yes, indicate the percentage of relevant confounders that were controlled (either in the design (e.g. stratification, matching) or analysis)? | NR             | NR             | NR             | 1 - 80-100% (most) | NR             |
| Rate of the section                |                                                                                                                                                  | 1              | 1              | 1              | 1                  | 1              |
| <b>D - BLINDING</b>                |                                                                                                                                                  |                |                |                |                    |                |
| Q1                                 | Was (were) the outcome assessor(s) aware of the intervention or exposure status of participants?                                                 | 3 - Can't tell     | 3 - Can't tell |
| Q2                                 | Were the study participants aware of the research question?                                                                                      | 3 - Can't tell     | 3 - Can't tell |
| Rate of the section                |                                                                                                                                                  | 2              | 2              | 2              | 2                  | 2              |
| <b>E - DATA COLLECTION METHODS</b> |                                                                                                                                                  |                |                |                |                    |                |
| Q1                                 | Were data collection tools shown to be valid?                                                                                                    | 3 - Can't tell | 3 - Can't tell | 1 - Yes        | 1 - Yes            | 1 - Yes        |
| Q2                                 | Were data collection tools shown to be reliable?                                                                                                 | 3 - Can't tell | 3 - Can't tell | 1 - Yes        | 1 - Yes            | 1 - Yes        |
| Rate of the section                |                                                                                                                                                  | 3              | 3              | 1              | 1                  | 1              |
| <b>F - WHITDRAWLS AND DROPOUTS</b> |                                                                                                                                                  |                |                |                |                    |                |
| Q1                                 | Were withdrawals and drop-outs reported in terms of numbers and/or reasons per group?                                                            | 2 - No         | 2 - No         | 1 - Yes        | 1 - Yes            | 3 - Can't tell |

|                                   |                                                                                                                                             |             |                |                |                   |                   |
|-----------------------------------|---------------------------------------------------------------------------------------------------------------------------------------------|-------------|----------------|----------------|-------------------|-------------------|
| Q2                                | Indicate the percentage of participants completing the study. (If the percentage differs by groups, record the lowest).                     | 1 - 80-100% | 1 - 80-100%    | 1 - 80-100%    | 3 - Less than 60% | 1 - 80-100%       |
| Rate of the section               |                                                                                                                                             | 1           | 1              | 1              | 3                 | 1                 |
| <b>G - INTERVENTION INTEGRITY</b> |                                                                                                                                             |             |                |                |                   |                   |
| Q1                                | What percentage of participants received the allocated intervention or exposure of interest?                                                | 1 - 80-100% | 1 - 80-100%    | 1 - 80-100%    | 1 - 80-100%       | 3 - Less than 60% |
| Q2                                | Was the consistency of the intervention measured?                                                                                           | 2 - No      | 2 - No         | 2 - No         | 2 - No            | 2 - No            |
| Q3                                | Is it likely influence that subjects received an unintended intervention (contamination or co-intervention) that may the influence results? | 4 - Yes     | 4 - Yes        | 6 - Can't tell | 5 - No            | 5 - No            |
| <b>H - ANALYSIS</b>               |                                                                                                                                             |             |                |                |                   |                   |
| Q1                                | Indicate the unit of allocation (circle one)                                                                                                | community   | community      | community      | community         | community         |
| Q2                                | Indicate the unit of analysis (circle one)                                                                                                  | community   | community      | community      | community         | community         |
| Q3                                | Are the statistical methods appropriate for the study design?                                                                               | 2 - No      | 1 - Yes        | 1 - Yes        | 1 - Yes           | 1 - Yes           |
| Q4                                | Is the analysis performed by intervention allocation status (i.e. intention to treat) rather than the actual intervention received?         | 2 - No      | 3 - Can't tell | 3 - Can't tell | 1 - Yes           | 2 - No            |
| <b>FINAL DECISION:</b>            |                                                                                                                                             | MODERATE    | MODERATE       | STRONG         | MODERATE          | STRONG            |

Legend: 1=strong; 2=moderate; 3=weak; NR=Not Reported.
